# Supplementary material for: Early Measurement of Blood sST2 Is a Good Predictor of Death and Poor Outcomes in Patients Admitted for COVID-19 Infection
Source: MDPI journal article supplement (doi:10.3390/jcm10163534), 2021-08-11
Supplement: s1 [file s1]

## Supplementary Material

# Early Measurement of Blood sST2 is a Good Predictor of Death and Poor Outcomes in Patients Admitted for COVID-19 Infection

Sánchez-Marteles M, Rubio-Gracia J, Peña-Fresneda N, Garcés-Horna V, Gracia-Tello B, Martínez-Lostao L, Crespo-Aznárez S, Pérez-Calvo JI, Giménez-López I

### SUPPLEMENTARY METHODS

#### Quantification of circulating sST2 in serum of hospitalized COVID-19 patients

Serum sST2 concentrations were determined in 150 COVID-19 patients admitted at hospital. Blood samples were withdrawn at admission, control and discharge. Blood was collected into clotting gel test tubes, centrifuged and serum was aliquoted and stored (Aragón's Health System Biobank) at -80°C until analysis. All biological samples were collected under informed consent. Eventually, 144 admission and control, and 80 discharge samples were processed and analyzed. Serum aliquots were virus-inactivated by treatment with 1% Triton-X100. On the day of the analysis, serum was thawed and diluted 1:50 in Reagent Diluent buffer (1% Bovine Serum Albumin in Phosphate Buffered Saline). Serum concentrations of soluble ST2 were determined by sandwich enzyme-linked immuno-sorbent assay (ELISA), and following instructions provided by kit manufacturer (DY523B, R&D Systems Europe Ltd). Briefly, serum samples and standards were incubated with capture antibody adsorbed to 96 well plates, followed by incubation with detection antibody. Analyte-antibody complexes were detected using a Horseradish Peroxidase-based colorimetric assay and OD450 signal was recorded using a microplate reader. sST2 serum concentrations were calculated from standard curve after blank subtraction. A set of sera from 60 healthy donors obtained through Aragón's Health System Biobank (BSSA) was also analyzed in this manner. These sera had been originally collected from two independent sources, and were selected to match patient cohort age and gender distribution. Random samples from COVID patients and healthy donors were re-run in independent assays to test and correct for inter-assay variability.

## SUPPLEMENTARY FIGURES

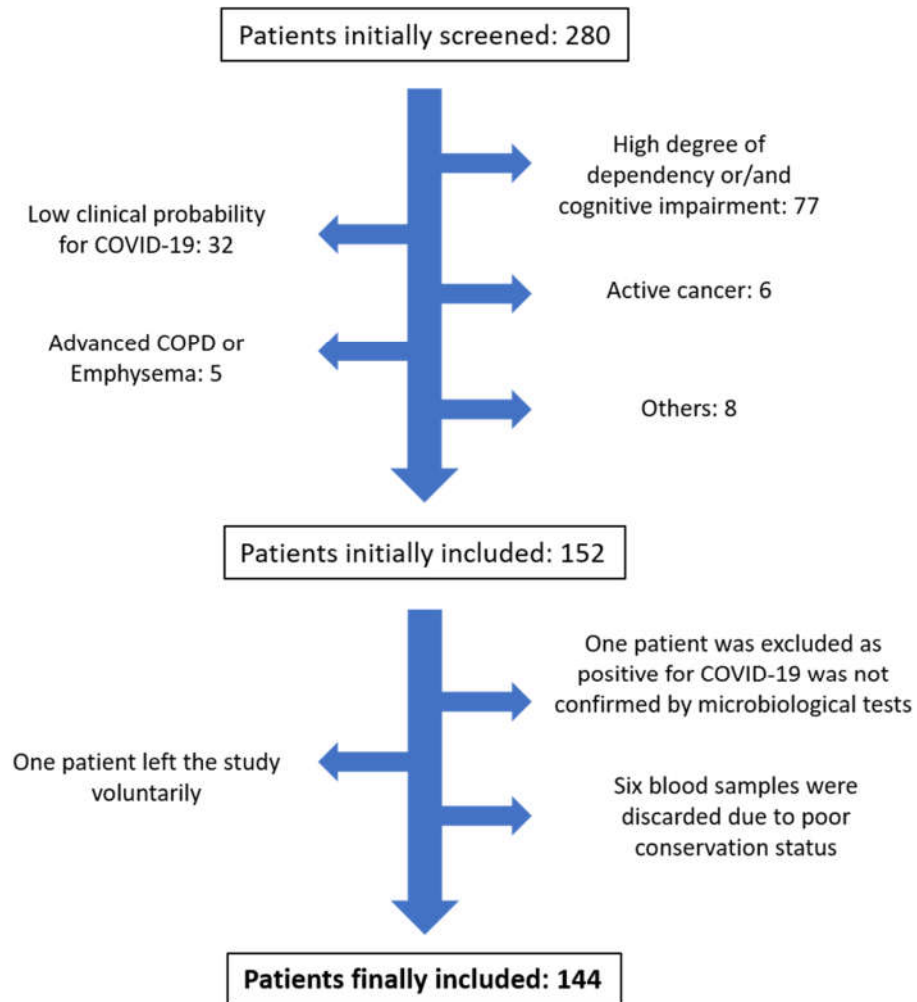

Supplementary Figure S1. Inclusion Flow chart.

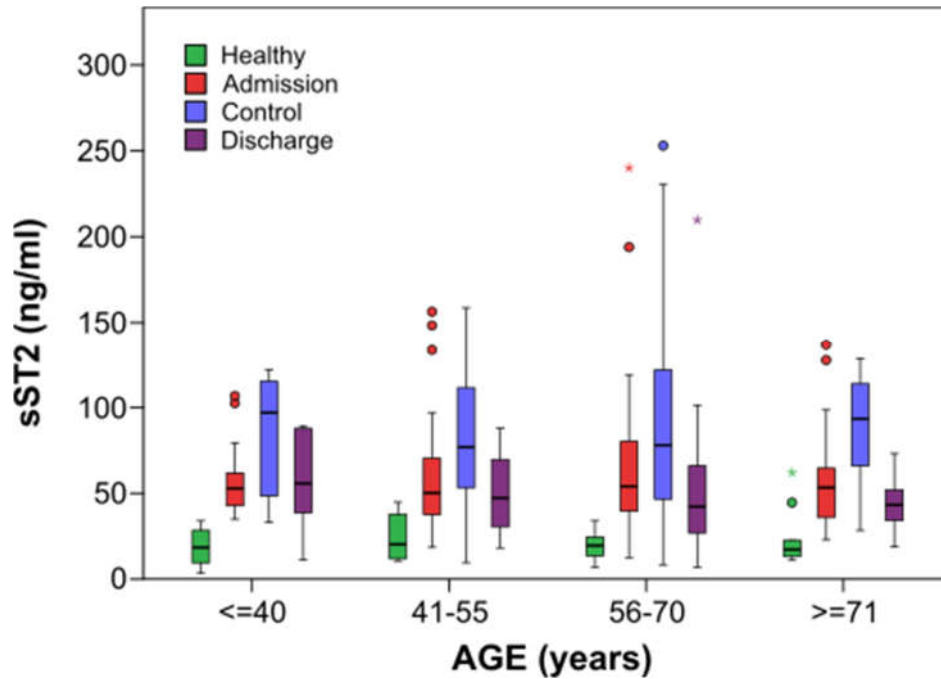

**Supplementary Figure S2.** sST2 concentrations across age groups. There were no differences between age groups in healthy donor, or COVID-19 patients ( $p>0.05$ ).

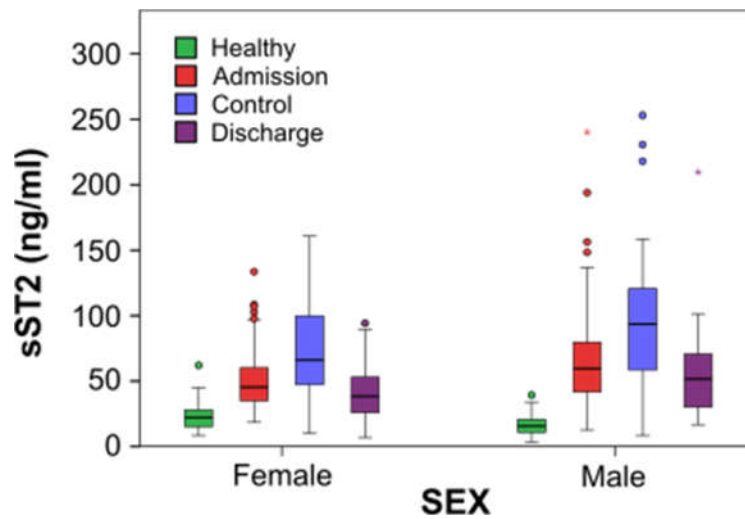

**Supplementary Figure S3.** Effect of gender on sST2 concentrations in COVID-19 disease. sST2 concentration was higher in female healthy donors than male ( $p=0.024$ ). However, for COVID-19 patients, sST2 concentrations were higher in males vs females ( $p=0.012$ ).

## SUPPLEMENTARY TABLES

**Supplementary Table S1.** Baseline characteristics according to primary outcome (in-hospital death and/or ICU admission for mechanical ventilation).

| Variable                                    | TOTAL        | NO           | YES          | p Value      |
|---------------------------------------------|--------------|--------------|--------------|--------------|
| <b>Total size (N)</b>                       | 144          | 129 (89.6)   | 15 (10.4)    |              |
| <b>Age (years)</b>                          | 57.5 ± 12.8  | 56.8 ± 12.9  | 63.2 ± 10.4  | 0.069        |
| <b>Gender-Male (n[%])</b>                   | 87 (60.4)    | 79 (61.2)    | 8 (53.3)     | 0.553        |
| <b>Duration of symptom (days)</b>           | 6.5 ± 3.3    | 6.5 ± 3.3    | 6.5 ± 2.6    | 0.974        |
| <b>Time until COVID confirmation (Days)</b> | 3 (7)        | 3 (7)        | 3 (6)        | 0.745        |
| <b>Comorbidities (n[%]):</b>                |              |              |              |              |
| • Hypertension                              | 54 (37.5)    | 46 (35.7)    | 8 (53.3)     | 0.181        |
| • Heart failure                             | 4 (2.8)      | 4 (3.1)      | 0 (0.0)      | 0.487        |
| • Dyslipidemia                              | 42 (29.2)    | 34 (26.4)    | 8 (53.3)     | <b>0.030</b> |
| • Coronary artery disease                   | 5 (3.5)      | 4 (3.1)      | 1 (6.7)      | 0.475        |
| • Diabetes                                  | 25 (17.4)    | 20 (15.5)    | 5 (33.3)     | 0.084        |
| • History of smoking                        | 48 (33.6)    | 42 (32.8)    | 6 (40.0)     | 0.577        |
| • COPD/Asthma                               | 16 (11.1)    | 13 (10.1)    | 3 (20.0)     | 0.247        |
| • Atrial/flutter fibrillation               | 5 (3.6)      | 4 (3.2)      | 1 (7.1)      | 0.448        |
| • CKD                                       | 7 (4.9)      | 6 (4.7)      | 1 (6.7)      | 0.731        |
| <b>Clinical variables</b>                   |              |              |              |              |
| • BMI (Kgs/m2)                              | 28.9 (6.4)   | 28.7 (6.9)   | 29.7 (4.9)   | 0.074        |
| • SBP (mmHg)                                | 126.9 ± 16.7 | 126.9 ± 17.1 | 127.2 ± 13.2 | 0.937        |
| • DBP (mmHg)                                | 77.2 ± 10.9  | 77.5 ± 11.2  | 74.9 ± 6.8   | 0.368        |
| • HR (bpm)                                  | 80.9 ± 12.8  | 80.7 ± 12.8  | 82.1 ± 12.8  | 0.695        |
| • Estimated PAFI (mmHg)                     | 367 (92)     | 403 (88)     | 340 (103)    | <b>0.005</b> |
| • Borg scale for dyspnea (points)           | 4 (6)        | 4 (6)        | 5 (4)        | 0.322        |
| <b>Laboratory:</b>                          |              |              |              |              |
| • Urea (mg/dL)                              | 33 (19)      | 33 (20)      | 35 (20)      | 0.631        |
| • Creatinine (mg/dL)                        | 0.94 (0.29)  | 0.89 (0.29)  | 1.03 (0.31)  | 0.059        |
| • Aspartate transaminase (U/L)              | 37 (27)      | 36 (27)      | 42 (29)      | 0.229        |
| • Alanine transaminase (U/L)                | 31 (28)      | 31 (29)      | 29 (22)      | 0.955        |
| • Creatin phosphokinase (U/L)               | 94 (92)      | 92 (85)      | 142 (196)    | 0.227        |
| • Lactate deshydrogenase (U/L)              | 306 (145)    | 297 (117)    | 382 (232)    | 0.069        |
| • C-Reactive Protein (mg/L)                 | 63 (81)      | 58 (74)      | 91 (128)     | 0.201        |
| • Ferritin (ng/mL)                          | 707 (908)    | 679 (933)    | 721 (478)    | 0.810        |
| • Hemoglobin (g/dL)                         | 14.2 ± 1.5   | 14.2 ± 1.53  | 14.0 ± 1.6   | 0.598        |
| • Total leucocytes (x 1000)                 | 5.6 (3.1)    | 5.5 (3.2)    | 6.9 (2.8)    | 0.397        |
| • Total lymphocytes (x 1000)                | 0.9 (0.7)    | 0.9 (0.6)    | 0.7 (0.4)    | 0.136        |
| • D-Dimer (ng/mL)                           | 688 (633)    | 672 (648)    | 819 (680)    | 0.274        |
| • Fibrinogen (mg/dL)                        | 775 (208)    | 774 (217)    | 785 (155)    | 0.819        |
| • Interleukine-6 (pg/mL)                    | 40 (30)      | 39 (30)      | 48 (49)      | 0.389        |
| • sST2 (ng/mL)                              | 53.1 (30)    | 52 (28)      | 80 (49)      | <b>0.001</b> |
| <b>X-Rays (n[%])</b>                        |              |              |              | 0.696        |
| • Normal                                    | 25 (17.9)    | 23 (18.4)    | 2 (13.3)     |              |
| • Unilateral consolidation                  | 35 (25.0)    | 31 (24.8)    | 4 (26.7)     |              |
| • Bilateral consolidations                  | 80 (57.1)    | 71 (56.8)    | 9 (60.0)     |              |
| <b>Therapies (n[%])</b>                     |              |              |              |              |
| • Colchicine                                | 10 (6.9)     | 9 (7.0)      | 1 (6.7)      | 0.964        |
| • Plasma                                    | 1 (0.7)      | 1 (0.8)      | 0 (0.0)      | 0.732        |
| • Remdesivir                                | 46 (31.9)    | 41 (31.8)    | 5 (33.3)     | 0.903        |
| • Systemic corticosteroids                  | 113 (78.5)   |              |              |              |

| Variable                                             | TOTAL      | NO         | YES      | p Value |
|------------------------------------------------------|------------|------------|----------|---------|
| • Medium dose of corticosteroids (Dexametasone [mg]) | 6 (3)      |            |          |         |
| • Low molecular weight heparin                       | 138 (95.8) | 123 (95.3) | 15 (100) | 0.058   |

Variables are expressed as mean  $\pm$  standard deviation or median (Interquartile range) BMI: Body Mass Index; CKD: Chronic Kidney Disease (estimated glomerular filtration rate  $< 60$  mL/min/1.73m<sup>2</sup> CKD-EPI-Creatinine method); COPD: Chronic Obstructive Pulmonary Disease; DBP: Diastolic Blood Pressure; HR: Heart Rate; SBP: Systolic Blood Pressure. sST2: Soluble ST2

**Supplementary Table S2.** Outcomes by sST2 concentrations at admission.

| Variable                                                                            | TOTAL     | sST2 < 58.9 | sST2 > 58.9 | p Value      |
|-------------------------------------------------------------------------------------|-----------|-------------|-------------|--------------|
| Primary outcome (n[%]):                                                             |           |             |             |              |
| • ICU admission and/or death                                                        | 15 (10.4) | 3 (3.7)     | 12 (19.4)   | <b>0.002</b> |
| Secondary outcomes:                                                                 |           |             |             |              |
| • Length of stay (days)                                                             | 8 (6)     | 7 (5)       | 7 (5)       | 0.810        |
| • Necessity of higher O2 therapy at 48/72 hours (n[%])                              | 47 (34.1) | 23 (29.1)   | 25 (40.7)   | 0.156        |
| • Necessity to update COVID-19 treatment at 48/72 hours (n[%])                      | 53 (37.9) | 26 (32.9)   | 27 (44.3)   | 0.170        |
| • Necessity of higher O2 therapy or update COVID-19 treatment at 48/72 hours (n[%]) | 66 (48.5) | 33 (42.9)   | 33 (55.9)   | 0.131        |

ICU: Intensive Care Unit. **Bold results** are statistically significant.
